# Supplementary material
Source: MDPI journal article supplement (https://www.mdpi.com/2073-4344/12/8/886)
Supplement: s1 [file s1]

## Supplementary Materials

# Efficient Removal of Organic Dye from Aqueous Solution Using Hierarchical Zeolite-Based Biomembrane: Isotherm, Kinetics, Thermodynamics and Recycling Studies

Sabarish Radoor <sup>1,\*</sup>, Jasila Karayil <sup>2</sup>, Aswathy Jayakumar <sup>1</sup>, Jaewoo Lee <sup>3,4</sup>, Debabrata Nandi <sup>1</sup>, Jyotishkumar Parameswaranpillai <sup>5</sup>, Bishweshwar Pant <sup>6,7,\*</sup>, Suchart Siengchin <sup>1,8,\*</sup>

<sup>1</sup> Materials and Production Engineering, The Sirindhorn International Thai-German Graduate School of Engineering (TGGS), King Mongkut's University of Technology North Bangkok, Bangkok 10800, Thailand; aswathyjayakumarj@gmail.com (A.J.); nandi.debabrata87@gmail.com (D.N.)

<sup>2</sup> Government Women's Polytechnic College, Calicut 673009, India; jessekarayil@gmail.com

<sup>3</sup> Department of Polymer-Nano Science and Technology, Jeonbuk National University, 567 Baekje-daero, Deokjin-gu, Jeonju-si 54896, Korea; jaewoolee@jbnu.ac.kr

<sup>4</sup> Department of Bionanotechnology and Bioconvergence Engineering, Jeonbuk National University, 567 Baekje-daero, Deokjin-gu, Jeonju-si 54896, Korea

<sup>5</sup> Department of Science, Alliance University, Bengaluru 562106, India; jyotishkumarp@gmail.com

<sup>6</sup> Carbon Composite Energy Nanomaterials Research Center, Woosuk University, Wanju 55338, Korea

<sup>7</sup> Woosuk Institute of Smart Convergence Life Care (WSCLC), Woosuk University, Chonbuk, Wanju 55338, Korea

<sup>8</sup> Institute of Plant and Wood Chemistry, Technische Universität Dresden, Piennner Str. 19, 01737 Tharandt, Germany

\* Correspondence: sabarishchem@gmail.com (S.R.); bisup@woosuk.ac.kr (B.P.); suchart.s.pe@tggs-bangkok.org (S.S.)

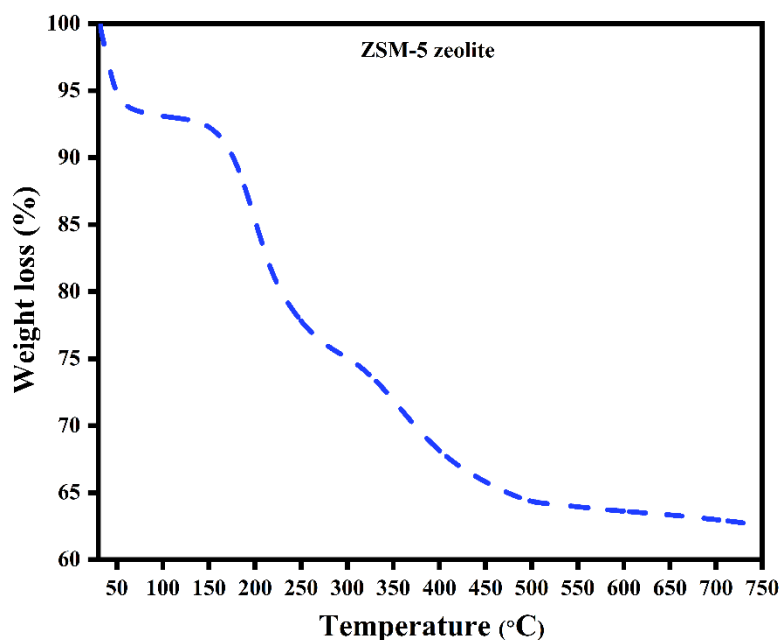

Figure S1: Thermogravimetric (TGA) of ZSM-5 zeolite

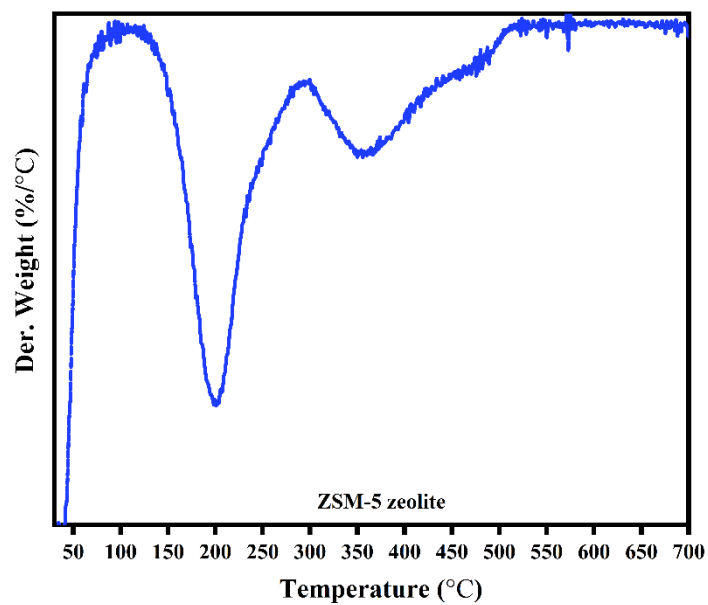

**Figure S2:** Differential thermal analysis (DTA) curves of of ZSM-5 zeolite
